# Supplementary material for: Conformational Changes in Talin on Binding to Anionic Phospholipid Membranes Facilitate Signaling by Integrin Transmembrane Helices
Source: PubMed Central journal article supplement (PMC3814715; doi:10.1371/journal.pcbi.1003316), 2013-10-31
Supplement: pcbi.1003316.s001.pdf [file pcbi.1003316.s001.pdf]

Figure S1:

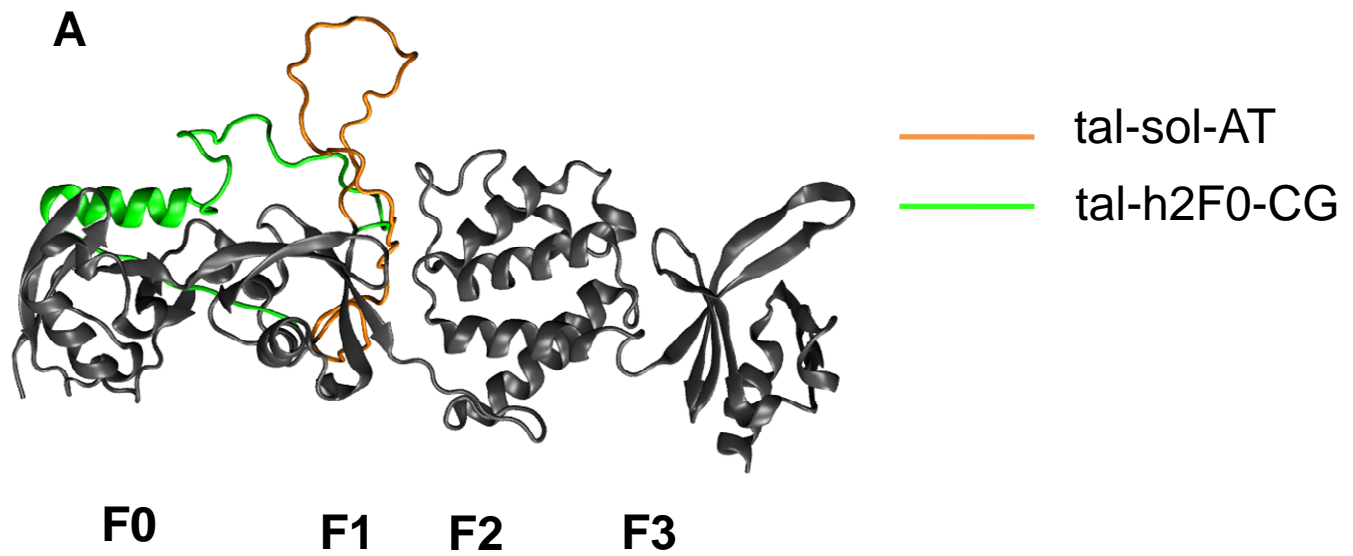

**B**

|     |            |            |            |             |            |            |     |
|-----|------------|------------|------------|-------------|------------|------------|-----|
| 1   | MVALSLKISI | GNVVKTMQFE | PSTMVYDACR | MIRERIPREAL | AGPPNDFGLF | LSDDDPKGGI | 60  |
| 61  | WLEAGKALDY | YMLRNGDTME | YRKKQRPLKI | RMLDGTVKTI  | MVDDSKTVTD | MLMTICARIG | 120 |
| 121 | ITNHDEYSLV | RELMEEKKDE | GTGTLRKDKT | LLRDEKKMEK  | LKQKLHTDDE | LNWLDHGRTL | 180 |
|     |            |            |            |             |            |            |     |
|     |            |            |            |             |            |            |     |
|     |            |            |            |             |            |            |     |
|     |            |            |            |             |            |            |     |
|     |            |            |            |             |            |            |     |
| 181 | REQVVEEHET | LLLRRKFFYS | DQNVDSRDPV | QLNLLYVQAR  | DDILNGSHPV | SFDKACEFAG | 240 |
| 241 | FQCQIQFGPH | NEQKHKAGFL | DLKDFLPKEY | VKQGERKIF   | QAHKNCGQMS | EIEAKVRYVK | 300 |
| 301 | LARSLKTYGV | SFFLVKEKMK | GKNKLVPRLL | GITKECVMRV  | DEKTKEVIQE | WSLTNIKRWA | 360 |
| 361 | ASPKSFTLDF | GDYQDGYYSV | QTTEGEQIAQ | LIAGYIDI    |            |            | 398 |

h1

h2
