# Supplementary material for: Conformational Changes in Talin on Binding to Anionic Phospholipid Membranes Facilitate Signaling by Integrin Transmembrane Helices
Source: PubMed Central journal article supplement (PMC3814715; doi:10.1371/journal.pcbi.1003316), 2013-10-31

Figure S2:

**Crystal structure:**

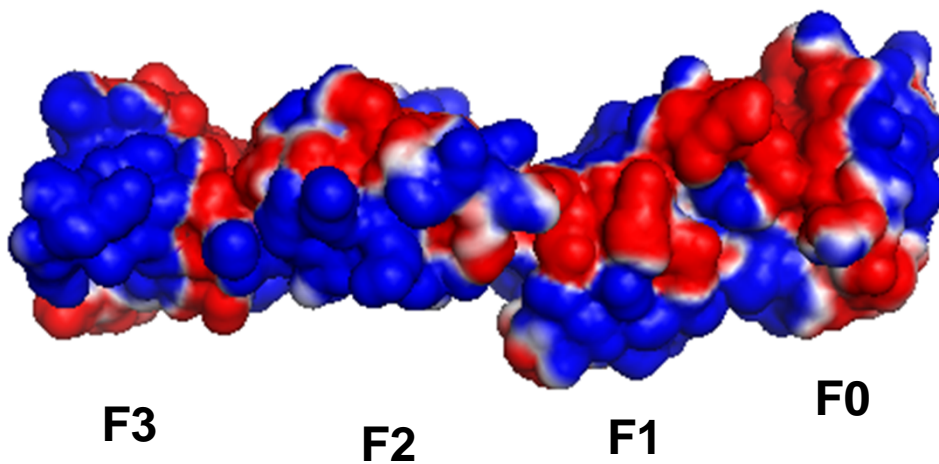

**Final snapshot from the tal\_sol-AT simulation:**

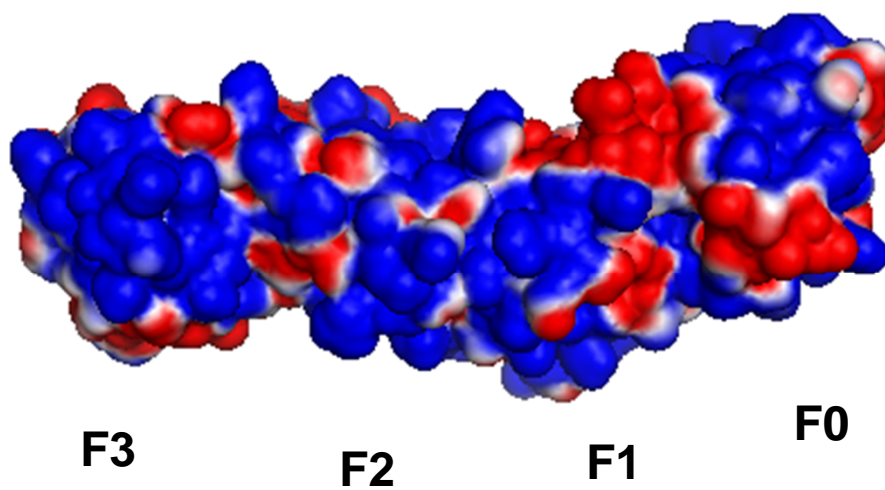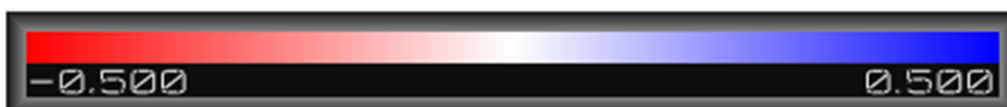

Supplement: pcbi.1003316.s002.pdf [file pcbi.1003316.s002.pdf]
