# Supplementary material for: Conformational Changes in Talin on Binding to Anionic Phospholipid Membranes Facilitate Signaling by Integrin Transmembrane Helices
Source: PubMed Central journal article supplement (PMC3814715; doi:10.1371/journal.pcbi.1003316), 2013-10-31

Figure S4:

**A**

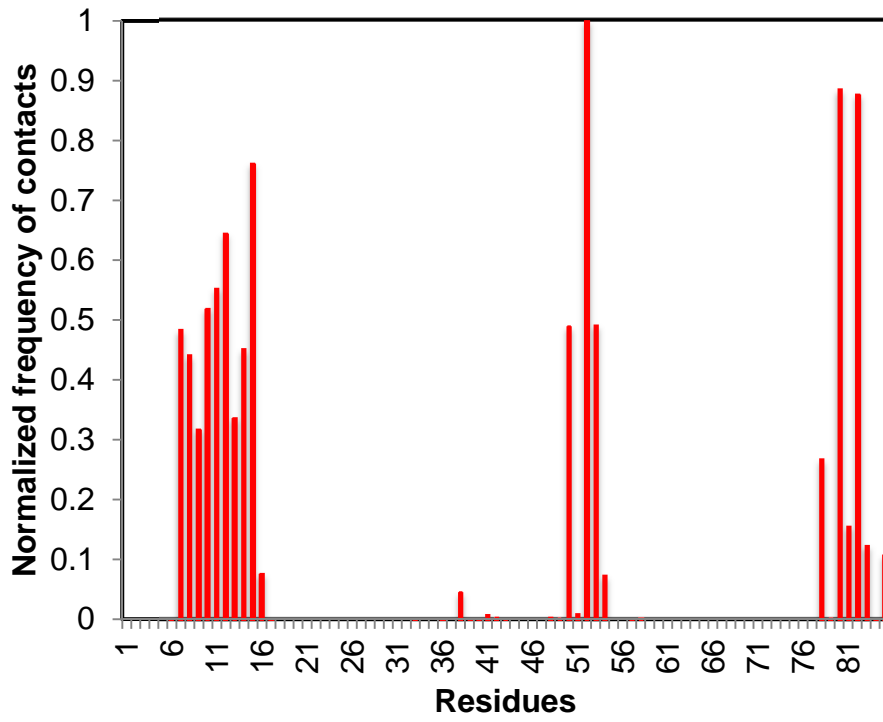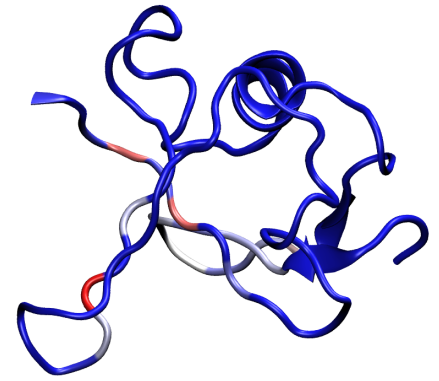

**B**

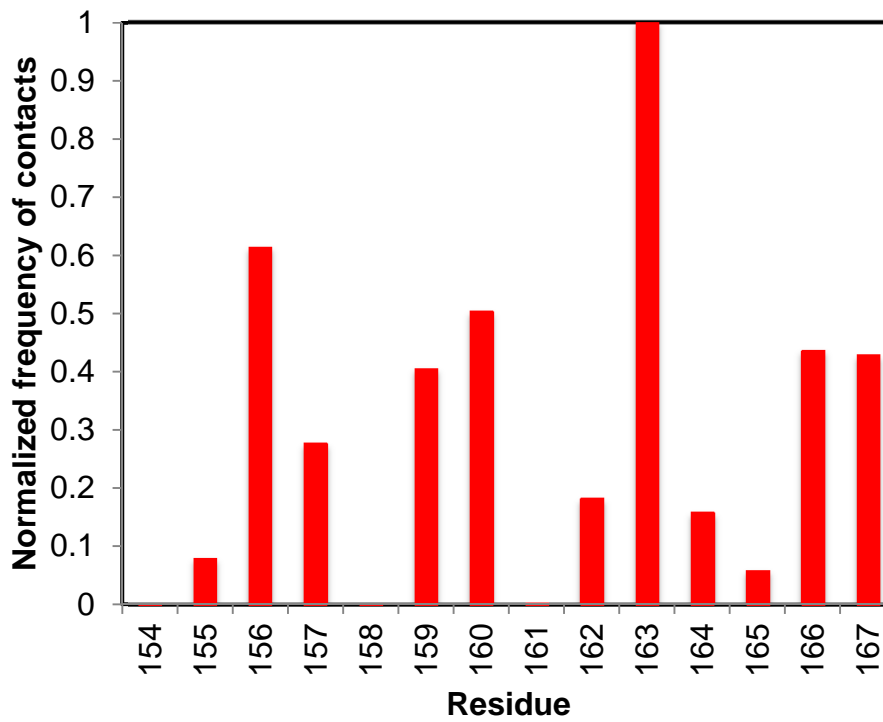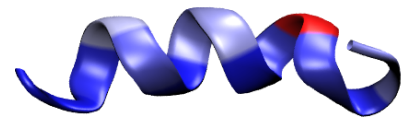

Supplement: pcbi.1003316.s004.pdf [file pcbi.1003316.s004.pdf]
