# Supplementary material for: Conformational Changes in Talin on Binding to Anionic Phospholipid Membranes Facilitate Signaling by Integrin Transmembrane Helices
Source: PubMed Central journal article supplement (PMC3814715; doi:10.1371/journal.pcbi.1003316), 2013-10-31

Figure S7:

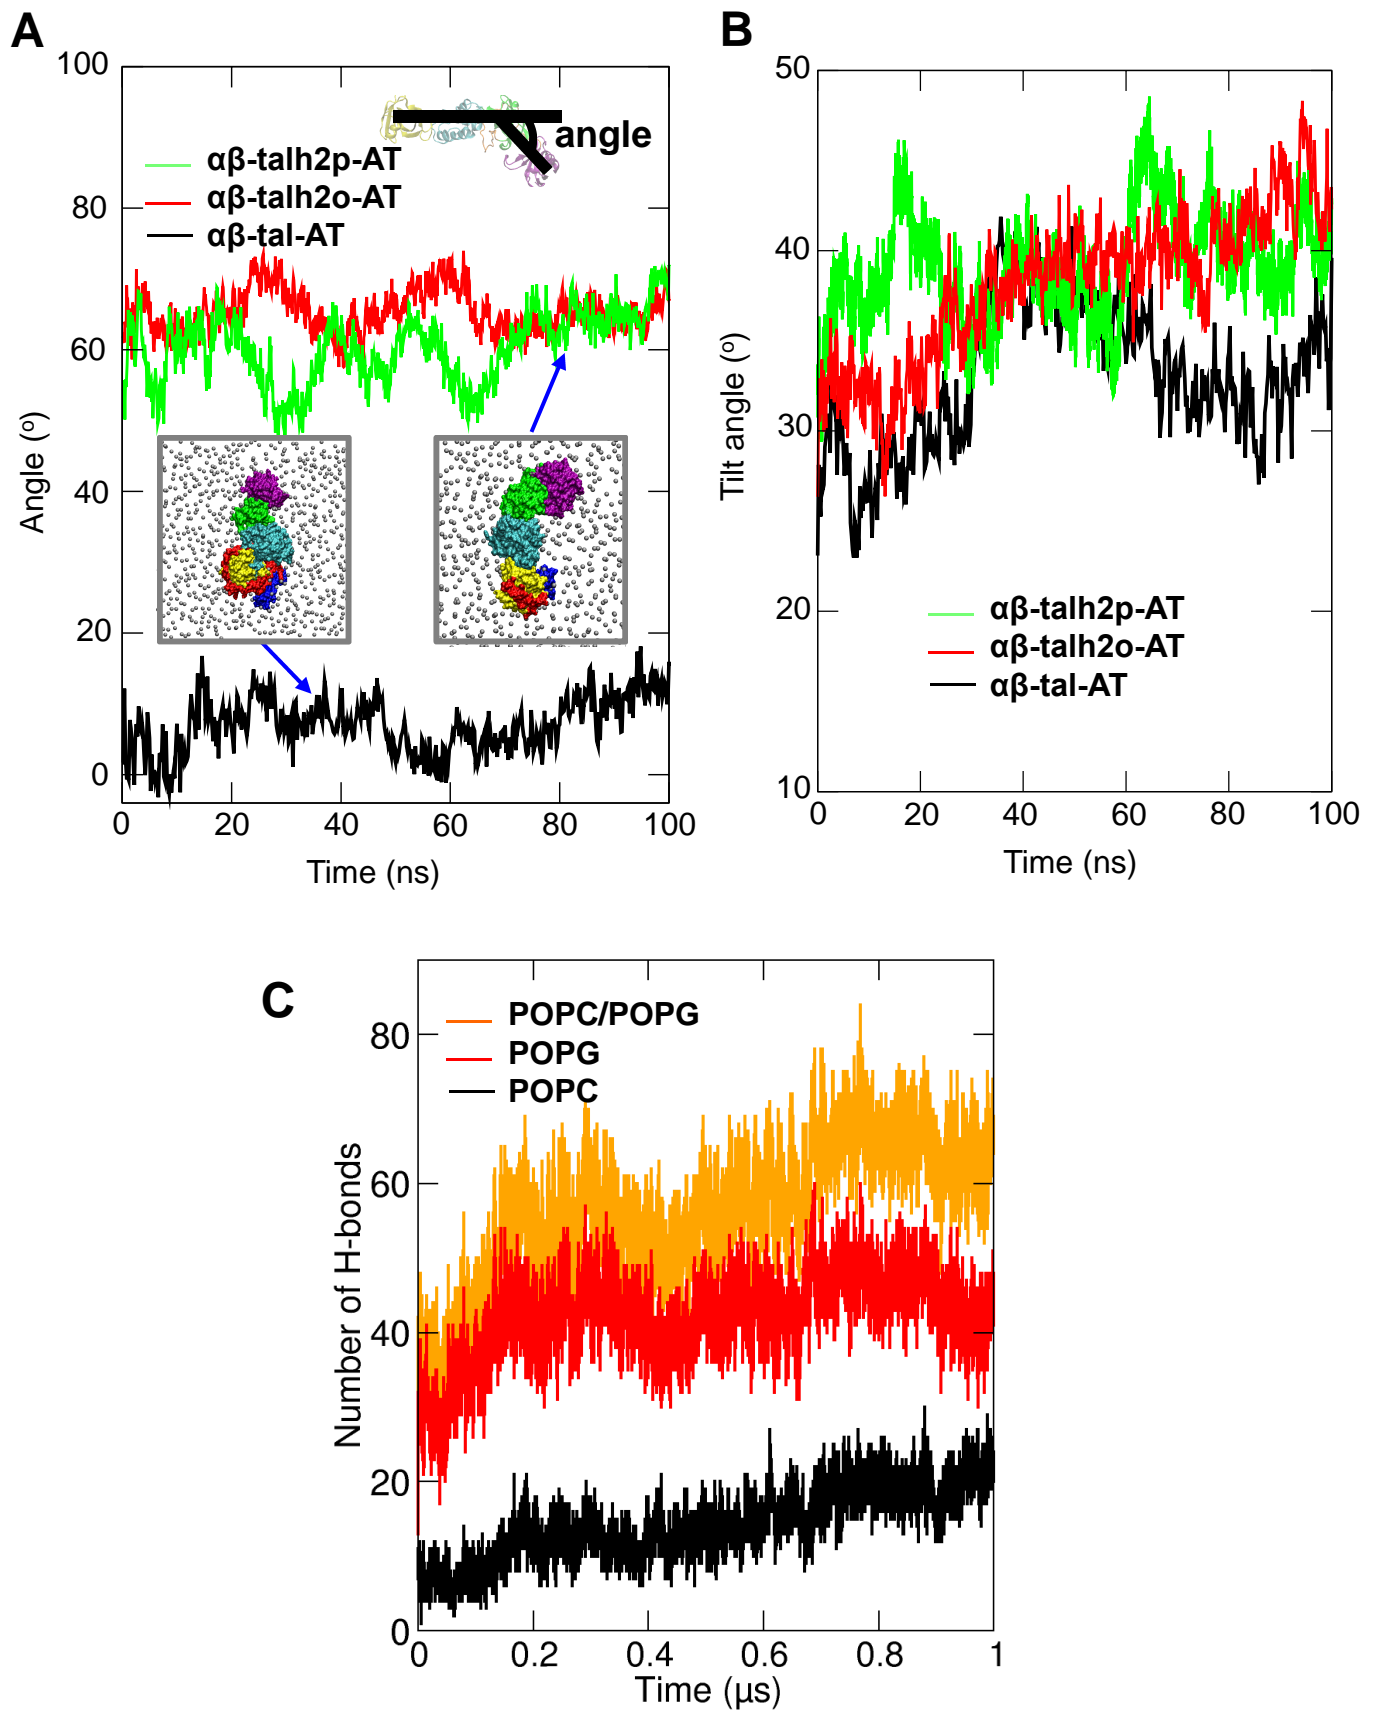

Supplement: pcbi.1003316.s007.pdf [file pcbi.1003316.s007.pdf]
