# Supplementary material for: Conformational Changes in Talin on Binding to Anionic Phospholipid Membranes Facilitate Signaling by Integrin Transmembrane Helices
Source: PubMed Central journal article supplement (PMC3814715; doi:10.1371/journal.pcbi.1003316), 2013-10-31
Supplement: pcbi.1003316.s009.pdf [file pcbi.1003316.s009.pdf]

**Table S1: Details of All Talin Simulations**

| Simulation    | Proteins                                                                                                | Duration (ns) |
|---------------|---------------------------------------------------------------------------------------------------------|---------------|
| tal-sol-AT    | F0-F1-F2-F3 (loop-res: 134-172; simulation in aqueous solution)                                         | 2x100         |
| tal-h2F0-CG   | F0-F1-F2-F3 (loop-res: 134-172/helix-res:154-167; conformation derived from the tal-sol-AT simulations) | 5x1500        |
| tal-h2F0pc-CG | F0-F1-F2-F3 (loop-res: 134-172/helix-res:154-167; conformation derived from the tal-sol-AT simulations) | 5x1500        |
| tal-IF0F1-CG  | F0-F1-F2-F3 (loop-res: 134-172; conformation derived from the tal-sol-AT simulations)                   | 5x1500        |
| tal-125-CG    | F0-F1-F2-F3 (loop-res: 134-172; harmonically restrained 25 kJ/mol/ Å <sup>2</sup> )                     | 5x1000        |
| tal-150-CG    | F0-F1-F2-F3 (loop-res: 134-172; harmonic restrained 50 kJ/mol/ Å <sup>2</sup> )                         | 5x1000        |
| tal-14E-CG    | F0-F1-F2-F3 (loop-res: 134-172 [4E])                                                                    | 5x1000        |
| tal-1K324D-CG | F0-F1-F2-F3 (loop-res: 134-172 [K324D])                                                                 | 5x1000        |
| tal-h2F0-AT   | F0-F1-F2-F3 (loop-res: 134-172/helix-res:154-167)                                                       | 3x45          |

In all simulations a POPC/POPG bilayer (ratio 3:2) was used, with the exception of the *tal-h2F0pc-CG* where a POPC bilayer was used.
