# Supplementary material for: Conformational Changes in Talin on Binding to Anionic Phospholipid Membranes Facilitate Signaling by Integrin Transmembrane Helices
Source: PubMed Central journal article supplement (PMC3814715; doi:10.1371/journal.pcbi.1003316), 2013-10-31
Supplement: pcbi.1003316.s010.pdf [file pcbi.1003316.s010.pdf]

**Table S2: Details of all talin/integrin TM simulations.**

| Simulation               | Proteins                                                                        | Coordinates          | Duration (ns)    |
|--------------------------|---------------------------------------------------------------------------------|----------------------|------------------|
| $\alpha\beta$ -talh2-CG  | $\alpha$ IIb/ $\beta^*$ TM/talin (loop-res: 134-172/helix-res: 154-167)         | 2K9J + 3G9W+<br>3IVF | 5x4000           |
| $\alpha\beta$ -talh2p-AT | $\alpha$ IIb/ $\beta^*$ TM/talin (loop-res: 134-172/helix-res: 154-167) partial |                      | 3x100            |
| $\alpha\beta$ -talh2o-AT | $\alpha$ IIb/ $\beta^*$ TM/talin (loop-res: 134-172/helix-res: 154-167) open    |                      | 2x100,<br>1x1000 |

TM = transmembrane helix.  $\beta^*$  indicates a chimeric  $\beta$  chain ( $\beta_3/\beta_{1D}$ ) – see Methods for details).

All simulations were of the protein complex in a POPC/POPG lipid bilayer.
