# Supplementary material for: Conformational Changes in Talin on Binding to Anionic Phospholipid Membranes Facilitate Signaling by Integrin Transmembrane Helices
Source: PubMed Central journal article supplement (PMC3814715; doi:10.1371/journal.pcbi.1003316), 2013-10-31
Supplement: pcbi.1003316.s011.pdf [file pcbi.1003316.s011.pdf]

| <b>Domain</b> | <b>Residue Type</b> | <b>Residue Number</b> |
|---------------|---------------------|-----------------------|
| F0            | LYS                 | 15                    |
|               | THR                 | 16                    |
|               | ASP                 | 53                    |
|               | ASP                 | 54                    |
| F1            | LYS                 | 137                   |
|               | GLU                 | 140                   |
|               | THR                 | 144                   |
|               | LEU                 | 145                   |
|               | ARG                 | 146                   |
|               | LYS                 | 147                   |
|               | LEU                 | 165                   |
|               | HIS                 | 166                   |
|               | THR                 | 167                   |
| F2            | GLU                 | 252                   |
|               | GLN                 | 253                   |
|               | LYS                 | 254                   |
|               | LYS                 | 256                   |
|               | PHE                 | 259                   |
|               | LYS                 | 263                   |
|               | ASP                 | 264                   |
|               | GLU                 | 269                   |
|               | LYS                 | 272                   |
|               | GLN                 | 273                   |
|               | LYS                 | 274                   |
|               | ARG                 | 277                   |
|               | PHE                 | 280                   |
| F3            | LYS                 | 318                   |
|               | MET                 | 319                   |
|               | GLY                 | 321                   |
|               | LYS                 | 322                   |
|               | LEU                 | 325                   |
|               | VAL                 | 326                   |
|               | GLU                 | 342                   |
|               | LYS                 | 343                   |
|               | LYS                 | 364                   |
|               | GLN                 | 381                   |
| THR           | 383                 |                       |
