# Supplementary material for: Conformational Changes in Talin on Binding to Anionic Phospholipid Membranes Facilitate Signaling by Integrin Transmembrane Helices
Source: PLOS journal article supplement (doi:10.1371/journal.pcbi.1003316), 2013-10-31
Supplement: S12 (10.1371/journal.pcbi.1003316.s012) [file journal.pcbi.1003316.s012]

301 Moved Permanently

# Moved Permanently

The document has moved here.

---

Apache Server at www.ploscompbiol.org Port 80
